1 **Heterogeneity of the placenta in health and disease explored through integrated**  
2 **histology, gene expression and modelling**

3 **Hannah Ee Juen Yong<sup>1,2\*</sup>, Kasia Maksym<sup>3,4\*</sup>, Muhammad Ashraf Bin Yusoff<sup>3</sup>, Esteban**  
4 **Salazar-Petres<sup>1</sup>, Tatiana Nazarenko<sup>3,5</sup>, Alexey Zaikin<sup>3,5</sup>, Anna L David<sup>3,4,6</sup>, Sara L**  
5 **Hillman<sup>3,4+</sup>, Amanda N. Sferruzzi-Perri<sup>1+</sup>**

6  
7 \*contributed equally; joint first author

8 +contributed equally; joint last and corresponding author

9  
10 <sup>1</sup>Centre for Trophoblast Research,  
11 Department of Physiology, Development and Neuroscience  
12 University of Cambridge  
13 Cambridge UK  
14 CB2 3EG

15  
16 <sup>2</sup>Singapore Institute for Clinical Sciences,  
17 Agency for Science, Technology and Research,  
18 Singapore

19  
20 <sup>3</sup>Elizabeth Gareth Anderson Institute for Women's Health,  
21 University College London,  
22 84-86 Chenies Mews, London UK  
23 WC1E 6HU

24 <sup>4</sup>Fetal Medicine Unit  
25 Elizabeth Gareth Anderson Wing,  
26 University College Hospitals NHS Trust,  
27 25 Grafton Way, London UK  
28 WC1E 6DB

29  
30 <sup>5</sup>Department of Mathematics,  
31 University College London,  
32 London UK

NOTE: This preprint reports new research that has not been certified by peer review and should not be used to guide clinical practice.

33 WC1E 6AE

34

35 <sup>6</sup> National Institute for Health Research University College London Hospitals Biomedical

36 Research Centre, 149 Tottenham Court Road, London W1T 7DN

37

38 Correspondence:

39 Amanda Sferruzzi-Perri ([ans48@cam.ac.uk](mailto:ans48@cam.ac.uk))

40 Sara Hillman ([sara.hillman@ucl.ac.uk](mailto:sara.hillman@ucl.ac.uk))

41

42 **Abstract:**

43 Fetal growth restriction (FGR) is a leading cause of perinatal morbidity and mortality. Altered  
44 placental formation and functional capacity are major contributors to FGR pathogenesis.  
45 Relating placental structure to function across the placenta in healthy and FGR pregnancies  
46 remains largely unexplored but could improve understanding of placental diseases. We  
47 investigated integration of these parameters spatially in the term human placenta using  
48 predictive modelling. Systematic sampling was able to overcome heterogeneity in placental  
49 morphological and molecular features. Defects in villous development, elevated fibrosis, and  
50 reduced expression of growth and functional marker genes (IGF2, VEGA, SLC38A1,  
51 SLC2A3) were seen in age-matched term FGR versus healthy control placentas. Characteristic  
52 histopathological changes with specific accompanying molecular signatures could be  
53 integrated through computational modelling to predict if the placenta came from a healthy or  
54 FGR pregnancy. Our findings yield new insights into the spatial relationship between placental  
55 structure and function and the aetiology of FGR.

56

57 Key words: Placenta, FGR, modelling, morphology, growth genes, transport

58

59

## 60 **Introduction:**

61 The human placenta is a highly specialized organ in pregnancy, whereby normal functioning  
62 is critical to fetal development and long-term health. By acting as a functional interface  
63 between the maternal and fetal circulation, it is responsible for maternal-fetal substrate  
64 exchange, protects the fetus from immune rejection by the mother and secretes hormones,  
65 which maintain pregnancy and promote healthy fetal growth and development<sup>1,2</sup>. This complex  
66 organ is structurally heterogeneous, not only in terms of its broad spatial macroscopic  
67 characteristics with multiple cotyledons and vascular supply, but also at the microscopic level  
68 of the villous tree and trophoblast. Even in pregnancies that deliver at term without any  
69 apparent pathology, novel techniques such as micro-CT are now describing the large degree of  
70 heterogeneity of vascular density and branching in the placenta<sup>3</sup>. In addition, computational  
71 models have predicted that local heterogeneity in placental vascular structure can have major  
72 impacts on the resistance of the fetoplacental circulation and placental dysfunction<sup>4</sup>.  
73 Investigating the spatial relationships between changes in gene expression and structural  
74 differences in the placenta is important, so that we may better elucidate the potential functional  
75 effect of placental pathology in obstetric disease.

76

77 Fetal growth restriction (FGR) is a major cause of perinatal morbidity and mortality. The risk  
78 of *in utero* or neonatal death is especially high amongst growth restricted fetuses and neonates  
79 who are commonly born preterm<sup>5</sup>. In some regions of the world, FGR and prematurity account  
80 for 80% of neonatal deaths<sup>6</sup>. FGR is diagnosed when a fetus fails to reach their genetically  
81 predefined growth potential and is often identified by fetoplacental ultrasound features (such  
82 as increased umbilical artery resistance to blood flow), and subsequently confirmed through  
83 placental histopathology<sup>7</sup>. The gestational age at diagnosis is used to further subdivide FGR  
84 into early-onset, detected before 32 weeks of gestation, and late-onset according to  
85 international consensus<sup>8</sup>. Neonates born following FGR have an increased risk of developing  
86 health problems, both in the immediate postnatal period including low blood sugars and poor  
87 temperature regulation and feeding, but also in later adult life in the form of cardiovascular and  
88 metabolic disease<sup>9,10</sup>. Management of pregnancies affected by FGR can be challenging, as  
89 timing of delivery has to be judged well, to balance the hazards of preterm birth against the  
90 risks of irreversible damage secondary to intrauterine hypoxia and nutritional deficiency or  
91 even stillbirth<sup>11</sup>.

92

93 The placenta of FGR pregnancies is characterized by reduced syncytiotrophoblast surface area,  
94 increased thickness of the exchange barrier formed by the trophoblast and fetal capillary  
95 endothelium and an increase in placental apoptosis<sup>12-15</sup>. Whilst it is recognized that there are  
96 key mediators of fetal growth that are influenced by placental function including but not limited  
97 to transfer of gases<sup>16</sup>, glucose<sup>17,18</sup>, lipids<sup>19</sup> and amino acids<sup>18,20</sup>, understanding the mechanisms  
98 through which placental histological changes might be affecting these pathways remains a  
99 challenge. Nuanced, integrated investigations will better delineate the underlying functional  
100 mechanisms related to the histological changes observed in the placenta. Experimental animal  
101 data has highlighted central roles that certain structural and functional changes play in the  
102 placenta to fetal growth outcomes<sup>21-25</sup>. However, data on how structure *and* molecular changes  
103 together impact on function and on each other, even in the form of nutrient transporter  
104 expression, are scarce or not available for the human placenta<sup>26,27</sup>.

105

106 Better understanding of how placental structure relates to functional capacity is further  
107 optimized through robust placental sampling protocols. Methodological errors arise from  
108 differences in sampling and/or tissue processing, which has previously hampered the  
109 reproducibility and possible extrapolation of placental studies<sup>28,29</sup>. Systematic uniform random  
110 sampling involves random selection of the first sampling site, with subsequent sites dictated  
111 by a pre-made sampling interval. This method is recommended to ensure representative and  
112 unbiased sampling of the placenta<sup>29,30</sup>. It is a simple method, allowing for even coverage of the  
113 placenta and ensures that all sites can only be selected once<sup>29</sup>. In practice, however, systematic  
114 uniform random sampling has limitations. Firstly, its lack of bias may be compromised if the  
115 pre-determined sampling interval coincides with a natural pattern existent in the placenta<sup>30</sup>.  
116 Secondly, placentae templates designed for systematic uniform random sampling assume all  
117 placentas to be roughly circular in shape, with central umbilical cord insertion. This assumption  
118 of a uniform shape and cord insertion however is incorrect. Although studies do show that  
119 mean placental chorionic shape at term is round, deviations in placental shape are associated  
120 with reduced placental efficiency<sup>31</sup>. In addition, the site of umbilical cord insertion appears to  
121 be related to placental function, with a marginal cord insertion near the outer boundary of the  
122 placenta being associated with a more asymmetric chorionic vessel structure<sup>32</sup>, which has been  
123 associated with FGR, stillbirth and neonatal death<sup>33</sup>.

124

125 While analysis of single sites may miss important histopathological and functional changes,  
126 multiple site collection poses analytical challenges, and methods may still fail to identify

127 critical differences within placentas affected by pathology, such as FGR. Statistical modelling  
128 allows for the exploration and integration of multiple data points from the same sample to  
129 provide more accurate interpretation of functional consequences. Moreover, the use of  
130 modelling to predict regional and disease state differences has high translational potential, for  
131 example providing an explanation for why the pregnancy was compromised and which baby  
132 may benefit the most from early health monitoring and/or postnatal intervention. With this  
133 study we therefore, firstly sought to better understand if systematic uniform random sampling  
134 methods could be optimised to the challenges that FGR placentas pose. Secondly, we sought  
135 to characterise the degree of detailed histological and molecular heterogeneity between  
136 multiple samples in healthy and FGR placentas and to examine potential links between  
137 histological changes and the expression of genes involved in placental formation, transport,  
138 and transcriptional regulation, and their relationships with fetal growth/pregnancy outcome.  
139 Finally, in a proof of principle approach, we integrated these changes into a novel analysis  
140 model to better delineate the significance of the placenta in health and disease.

141

## 142 **Results:**

### 143 **Patient characteristics**

144 We matched FGR cases and controls for maternal age, booking BMI, mode of delivery and  
145 infant sex (Table 1) with expanded clinical data available (Supplementary Table 1).  
146 Nonetheless, several significant differences in clinical characteristics were still observed. FGR  
147 cases were more likely to be non-White and delivered infants with lower birth and placental  
148 weights about a week earlier, although all delivered at term ( $>36^{+6}$  weeks of gestation).

149

150 **Table 1: Patient characteristics.**

| <b>Characteristics</b>                 | <b>Control (N=9)</b>                          | <b>FGR (N=7)</b>                               | <b>P-value</b> |
|----------------------------------------|-----------------------------------------------|------------------------------------------------|----------------|
| Maternal age                           | 34.44 $\pm$ 1.84                              | 32.00 $\pm$ 1.16                               | 0.339          |
| Maternal ethnicity                     | 8 white, 1 non-white                          | 2 white, 5 non-white                           | 0.035          |
| Booking BMI (kg/m <sup>2</sup> )       | 24.67 $\pm$ 1.51                              | 24.47 $\pm$ 2.75                               | 0.946          |
| Mode of delivery                       | 4 vaginal deliveries,<br>5 caesarean sections | 2 vaginal deliveries,<br>5 caesarean sections, | 0.620          |
| Gestational age<br>at delivery (weeks) | 39.14 (39.07 – 39.79)                         | 38.29 (37.29 – 39.00)                          | 0.006          |
| Infant sex                             | 4F, 5M                                        | 2F, 5M                                         | 0.633          |
| Infant birthweight (kg)                | 3.53 $\pm$ 0.13                               | 2.33 $\pm$ 0.18                                | < 0.001        |

|                      |              |              |       |
|----------------------|--------------|--------------|-------|
| Placental weight (g) | 478.9 ± 16.6 | 340.7 ± 31.0 | 0.001 |
|----------------------|--------------|--------------|-------|

151 Data are presented as mean ± SEM and were analysed by Student's t test or Mann-Whitney U  
152 test. Categorical data were analysed by 2 X 2 contingency table with Fisher's Exact Test. BMI,  
153 body mass index; F, female; M, male.

154

### 155 **Stereological analysis of placental morphology**

156 Comparing stereological findings by sampling site within the FGR or control groups showed  
157 no significant differences between samples taken from the central and peripheral regions of the  
158 placenta (Supplementary Table 2). Hence, we averaged the data of the central and peripheral  
159 regions of each placenta to compare by pathology (Table 2). Taking into consideration a false  
160 discovery rate of 5% for multiple testing, FGR placentas had significantly lower volume  
161 densities of intermediate villi, syncytial knots and higher volume densities fibrosis and  
162 capillaries. Once placental weight was accounted for, FGR cases showed decreased volumes  
163 of intervillous spaces, intermediate villi, terminal villi, syncytial knots, trophoblast and stromal  
164 components, and increased volume of fibrosis compared to control placentas. There were no  
165 differences in any measure of barrier thickness, surface area, surface densities and diffusion  
166 capacities between FGR and control placentas; except that FGR placentas had a decreased villi  
167 surface area.

168

169 **Table 2: Morphological differences in the placenta by pathology**

|                                                                 | <b>Control (N=9)</b> | <b>FGR (N=7)</b> | <b>P-value<br/>(<sup>^</sup>FDR)</b> |
|-----------------------------------------------------------------|----------------------|------------------|--------------------------------------|
| <b>Volume density (cm<sup>3</sup>/g)</b>                        |                      |                  |                                      |
| Intervillous space                                              | 0.37±0.01            | 0.36±0.02        | 0.447                                |
| Stem villi                                                      | 0.06±0.01            | 0.06±0.01        | 0.895                                |
| Intermediate villi                                              | 0.12±0.01            | 0.08±0.01        | 0.008*                               |
| Terminal villi                                                  | 0.42±0.02            | 0.4±0.03         | 0.474                                |
| Syncytial knots                                                 | 0.02±0.00            | 0.01±0.00        | 0.002*                               |
| Fibrosis                                                        | 0.01±0.01            | 0.1±0.02         | 0.001*                               |
| Trophoblast                                                     | 0.32±0.01            | 0.34±0.03        | 0.583                                |
| Stromal                                                         | 0.55±0.02            | 0.45±0.05        | 0.058                                |
| Capillary                                                       | 0.13±0.01            | 0.21±0.03        | 0.016*                               |
| <b>Volume (cm<sup>3</sup>)</b>                                  |                      |                  |                                      |
| Intervillous space                                              | 179.73±9.45          | 119.44±10.77     | 0.001*                               |
| Stem villi                                                      | 27.83±3.2            | 20.17±4.25       | 0.163                                |
| Intermediate villi                                              | 55.4±4.41            | 25.48±2.43       | <0.001*                              |
| Terminal villi                                                  | 200.73±10.54         | 135.3±16.23      | 0.003*                               |
| Syncytial knots                                                 | 8.39±0.78            | 2.44±0.71        | <0.001*                              |
| Fibrosis                                                        | 5.88±3.24            | 37.02±7.43       | 0.001*                               |
| Trophoblast                                                     | 153.5±6.83           | 114.7±13.69      | 0.017*                               |
| Stromal                                                         | 263.09±15.46         | 153.23±21.66     | 0.001*                               |
| Capillary                                                       | 62.3±5.04            | 72.78±13.76      | 0.445                                |
| <b>Barrier thickness (µm)</b>                                   |                      |                  |                                      |
| Arithmetic mean                                                 | 2.83±0.08            | 2.85±0.18        | 0.912                                |
| Harmonic mean                                                   | 2.14±0.07            | 2.24±0.14        | 0.500                                |
| Thickness uniformity index (a measure of thickness variability) | 1.32±0.01            | 1.48±0.08        | 0.044                                |
| <b>Surface density (cm<sup>2</sup>/cm<sup>3</sup>)</b>          |                      |                  |                                      |
| Villi                                                           | 610.45±23.85         | 630.28±44.68     | 0.683                                |
| Fetal capillary                                                 | 298.26±19.81         | 401.92±48.29     | 0.048                                |
| <b>Surface area (m<sup>2</sup>)</b>                             |                      |                  |                                      |



|                                                                    |            |            |        |
|--------------------------------------------------------------------|------------|------------|--------|
| Villi                                                              | 11.68±2.88 | 10.59±1.55 | 0.009* |
| Fetal capillary                                                    | 6.27±1.7   | 6.89±1.23  | 0.576  |
| <b>Theoretical diffusion capacity<br/>(cm<sup>2</sup>/min/kPa)</b> | 95.29±4.86 | 70.26±11.5 | 0.047  |
| <b>Specific diffusion capacity<br/>(cm<sup>2</sup>/min/kPa/g)</b>  | 27.2±1.49  | 29.47±3.99 | 0.567  |

170 Data presented as mean ± SEM and analysed by t test with FDR (false discovery correction)  
171 correction at 5%. \* denotes significant findings that passed the 5% FDR.

172

### 173 **Placental expression of growth factors and nutrient transporters**

174 We also evaluated relative mRNA expression of selected growth factors and nutrient  
175 transporters (Figure 1) that have been previously implicated in transcriptional control or with  
176 compromised fetal growth in humans and animal models of FGR<sup>34-39</sup>. Placental *IGF2*, *SLC2A3*  
177 and *SLC38A1* expression was significantly lower for FGR versus controls, regardless of  
178 sampling location (Figures 1A, 2D and 2E). *VEGFA* expression was significantly lower in the  
179 peripheral region as compared to the central region of FGR placentas, while no statistical  
180 difference was identified in the central region between cases and controls (Figure 1B). Only  
181 *SLC2A1* expression was significantly increased in FGR placenta as compared to controls,  
182 independent of sampling location (Figure 1C). No differences in mRNA expression of and  
183 *SLC38A2* were observed between FGR and control placentas or by sampling location (Figure  
184 1F). In controls, placental *HNF1A* expression was higher in the peripheral region as compared  
185 to the central region (Figure 1G), but no differences were identified for FGR.

186

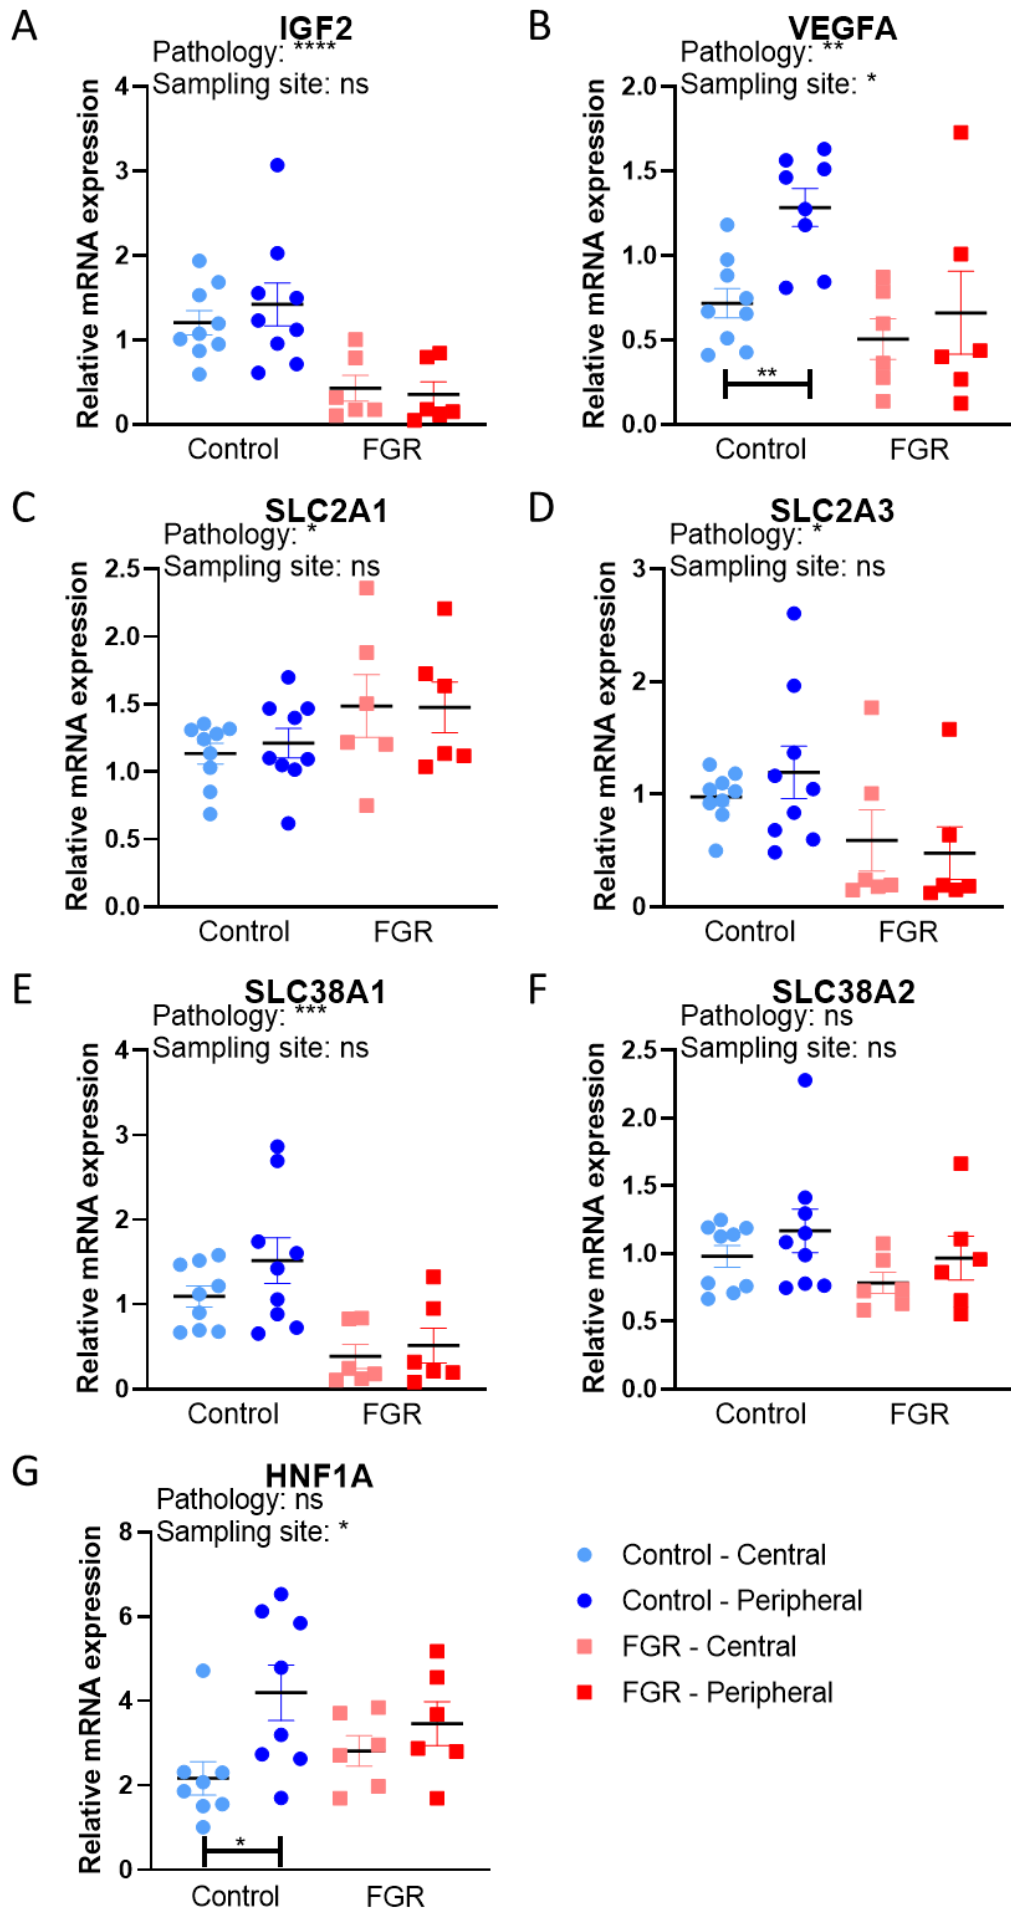

188 **Figure 1: Relative mRNA expression of selected growth factors and nutrient transporters**  
189 **in control and FGR placentas.** Expression of growth factors (*IGF2*, *VEGFA*), and  
190 transporters (*SLC2A1*, *SLC2A3*, *SLC38A1*, *SLC38A2* and the transcription factor *HNF1A*),  
191 were evaluated by qPCR. A total of 3 outliers were excluded; 1 control peripheral value for  
192 *VEGFA*, and 1 control central value and 1 control peripheral value for *HNF1A*. Data are  
193 presented with individual data points with mean  $\pm$  SEM and analysed with two-way ANOVA,  
194 followed by Sidak's post hoc test for multiple comparisons. \* $p < 0.05$ , \*\* $p < 0.01$ , \*\*\* $p < 0.001$ ,  
195 \*\*\*\* $p < 0.0001$ .

196

### 197 **Associations between placental morphology and expression of functional genes**

198 We next evaluated relationships between placental morphology and the expression of growth  
199 factor and nutrient transporter genes within the different sampling sites, and between control  
200 and FGR groups using Pearson's  $r$  coefficient (Figure 2). In FGR placentas, several inverse  
201 correlations were identified between expression of *IGF2*, *VEGFA*, *SLC38A1* and *SLC2A3* and  
202 the volume of terminal villi, trophoblast, and capillary volume predominantly in the peripheral  
203 region of FGR placentas. Inverse correlations with fibrosis volume were also observed for  
204 expression *IGF2*, *VEGFA*, *SLC38A1* and *SLC2A3* in the central region of FGR placentas.  
205 Additionally, the relative expression of *IGF2*, *VEGFA*, *SLC38A1* and *SLC2A3* genes was  
206 inversely correlated with barrier thickness uniformity index and both maternal blood spaces  
207 and fetal capillaries surface densities in the FGR placenta (central and peripheral sites),  
208 although no significant correlations were detected for the control placenta. Moreover, the  
209 expression of *IGF2*, *SLC38A1* and *SLC2A3* genes negatively correlated with both theoretical  
210 and specific diffusion capacity in FGR, but not control placentas. In contrast, FGR expression  
211 of *HNF1A* showed a positive correlation with specific diffusion capacity in the peripheral  
212 region. Positive correlations between the expression of all genes measured and fibrosis and  
213 stromal volumes were found for the peripheral region of control placentas, but not FGR  
214 placentas. Positive relationships were also seen for expression of *VEGFA* and *HNF1A* with the  
215 stem villi volume in central sites of control placentas.

216

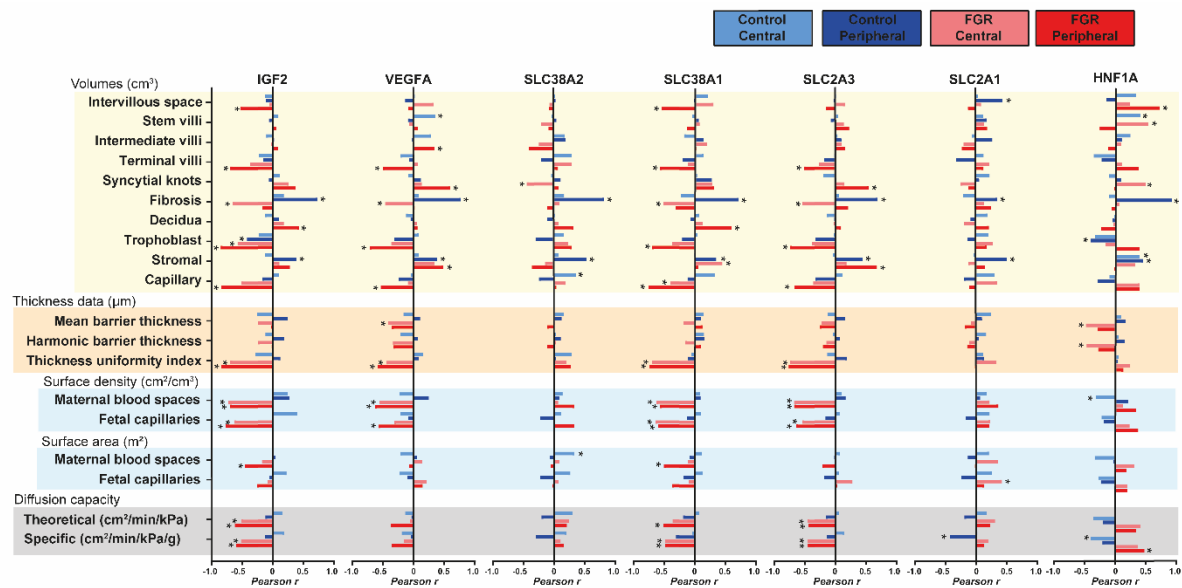

217

218 **Figure 2. Correlations between stereological parameters and the relative expression of**  
 219 **functional genes in the placenta.** Pearson's r coefficient was plotted and used to indicate  
 220 strength of relationship between data (0: low, 1: high) and direction of correlation (+ sign:  
 221 direct correlation and – sign: inverse correlation). Analysis was performed on each sampling  
 222 site and experimental group (control and FGR) separately. Sample size was 36 for control and  
 223 24 for FGR. \*:  $p < 0.05$ , correlation is statistically significant.

224

## 225 Predictive modelling

226 To evaluate the information gained from different placental regions/sampling sites (only  
 227 peripheral, only central, or both together) and data types (only stereological data, only qPCR  
 228 data or both together), we considered all their possible combinations using predictive  
 229 modelling (construction of classifiers that would make it possible to distinguish patients in the  
 230 control group from patients with FGR). As predictive modelling was carried out using three  
 231 machine learning (ML) methods; *xgbTree*, *glmnet* and *nnet*, this resulted in 27 models for  
 232 consideration. The binary outcome of FGR was used as an outcome with chosen set of features  
 233 (only stereological data, only qPCR data, both data types together) used as predictors. The  
 234 predictive performance of each model was assessed using a leave-one-out cross-validation  
 235 (LOOCV) scheme: the prediction was made for each patient (with all measurements) by  
 236 excluding (withholding) it from the dataset, training the classifier on the remaining  
 237 (independent) samples, and then generating predictions for the withheld samples using the  
 238 trained model. Using predictions on the training subset (on each round of LOOCV procedures),  
 239 the best threshold (corresponding to the best sum of sensitivity plus specificity) distinguishing

240 controls from FGR cases was found and a binary result was calculated for each withheld sample  
241 (1 indicated FGR if the prediction was above the threshold, and 0 indicated control if it was  
242 below the threshold). Through all rounds, LOOCV procedure binary results were collected for  
243 withheld samples and performance was assessed using by these sets of predictions.  
244 Performance was estimated using areas under the ROC curve (AUCs) in 2 ways: “AUC for all  
245 samples” and “AUC for all patients”, as described in Methods. For each combination of  
246 “placenta part + type of measurement + ML model” two such AUC values were obtained. Full  
247 results of these analyses can be found in Table 3 (in addition, we provide a complete table of  
248 errors for each patient in Supplementary Table 3). For a simplified visualization of these  
249 results, we considered the distributions of results (AUCs) of different types of ML models on  
250 different types of data obtained in different parts of the placenta for all patients and for all their  
251 samples separately (Figure 3). This plot clearly shows that among the considered models, the  
252 best are those based on measurements performed on the peripheral parts of the placenta and  
253 using stereological and qPCR data together. As shown in Table 3, the best model was found to  
254 be *nnet*, i.e., the model using simple artificial neural networks for a classification. This model  
255 gave the best result for both “AUC for all samples” (0.979) and “AUC for all patients” (0.917).  
256 By considering the stereological and qPCR data separately, the stereological data showed a  
257 greater predictive power than the qPCR data (Figure 3, for all variants), which, may be due to  
258 the clearly different interdependences of the stereological parameters of the control group and  
259 the FGR group (the most significant interdependences are presented in Supplementary Figure  
260 1). However, a combination of stereology and qPCR data works better than just stereology for  
261 analyses on peripheral parts of the placenta (Figure 3). The results obtained on the central parts  
262 of the placenta were lower than the results obtained on both parts of the placenta or only on the  
263 peripheral (boxplots for the central parts are slightly lower than the other options). Moreover,  
264 results using only peripheral parts were better than using a combination of both parts. Thus,  
265 the best model would be that based on measures made on the peripheral parts of the placenta  
266 using stereological and qPCR data together.

267

268

269 **Table 3: Predictive modelling results using different machine learning methods.**

| Peripheral & Central |            |        |       |         |        |       |                   |        |              |
|----------------------|------------|--------|-------|---------|--------|-------|-------------------|--------|--------------|
|                      | Stereology |        |       | qPCR    |        |       | Stereology & qPCR |        |              |
|                      | xgbTree    | glmnet | nnet  | xgbTree | glmnet | nnet  | xgbTree           | glmnet | nnet         |
| AUC for all samples  | 0.899      | 0.913  | 0.927 | 0.705   | 0.733  | 0.719 | 0.875             | 0.92   | 0.948        |
| AUC for all patients | 0.611      | 0.861  | 0.917 | 0.639   | 0.528  | 0.528 | 0.694             | 0.861  | 0.917        |
| Peripheral           |            |        |       |         |        |       |                   |        |              |
|                      | Stereology |        |       | qPCR    |        |       | Stereology & qPCR |        |              |
|                      | xgbTree    | glmnet | nnet  | xgbTree | glmnet | nnet  | xgbTree           | glmnet | nnet         |
| AUC for all samples  | 0.903      | 0.938  | 0.924 | 0.681   | 0.694  | 0.681 | 0.819             | 0.938  | <b>0.979</b> |
| AUC for all patients | 0.861      | 0.917  | 0.861 | 0.556   | 0.556  | 0.556 | 0.778             | 0.917  | <b>0.917</b> |
| Central              |            |        |       |         |        |       |                   |        |              |
|                      | Stereology |        |       | qPCR    |        |       | Stereology & qPCR |        |              |
|                      | xgbTree    | glmnet | nnet  | xgbTree | glmnet | nnet  | xgbTree           | glmnet | nnet         |
| AUC for all samples  | 0.889      | 0.903  | 0.903 | 0.722   | 0.694  | 0.722 | 0.826             | 0.889  | 0.889        |
| AUC for all patients | 0.778      | 0.861  | 0.861 | 0.611   | 0.611  | 0.611 | 0.722             | 0.861  | 0.806        |

270 **Results for each combination of “placenta part + type of measurement + ML model”** The  
 271 best version of the model is *nnet* model (highlighted in bold) on peripheral parts of placenta  
 272 using stereological and qPCR data together. In this case, “AUC for all patients” = 0.917  
 273 (corresponding to an error for just one patient-case in a sample of 15 patients: 9 controls and 6  
 274 FGR), and “AUC for all samples” = 0.979 (corresponding to an error for only one

275 measurement, a FGR in a set of 15\*4 samples: 9\*4 control samples and 6\*4 FGR samples). A  
276 complete table of errors is given in Supplementary Table 3.  
277

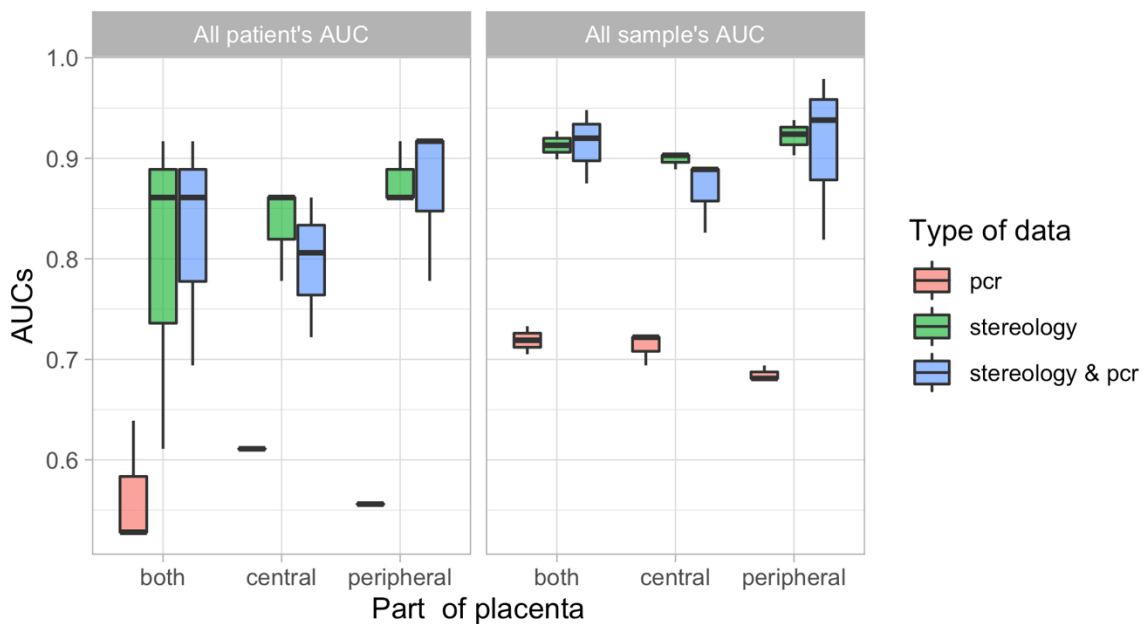

278  
279 **Figure 3: Distributions of AUCs, i.e., the performance results of different types of models**  
280 **on different types of data obtained on different parts of the placenta for all patients and**  
281 **for all their measurements separately.**

282  
283 **Discussion**

284 There was no significant variability in the morphological features of the placenta within and  
285 between the peripheral and central sites of the placenta, regardless of whether they came from  
286 a healthy or FGR pregnancy. In addition, the findings indicate that alterations in placental  
287 morphology may be uniform across the placenta in late-onset FGR pregnancies without other  
288 complications, such as pre-eclampsia, that can lead to more variable histological changes  
289 across the placenta<sup>40</sup>.

290  
291 Despite established evidence that the placenta drives a number of the 'great obstetrical'  
292 syndromes, which includes FGR, the relatively poor understanding of underlying placental  
293 mechanisms makes interpretation of how they contribute to clinical presentations difficult<sup>41</sup>.  
294 Heterogeneity within the placenta is thought to be responsible for some of the difficulties in  
295 directly relating disease state to placental findings. Our results suggest that the systematic  
296 sampling technique that we used was able to overcome potential morphological spatial  
297 heterogeneity of the term placenta, whether from normal or late FGR pregnancies. Indeed,

298 peripheral versus central region comparisons revealed unique features in gene expression  
299 correlations and predictive modelling results. These findings enable more clinical  
300 interpretations to be made of the results and indicate that using of this sampling technique may  
301 improve reproducibility between placental studies. This analysis suggests that at least a  
302 peripheral and central sample should be taken when assessing placental function, particularly  
303 in disease states.

304

305 Morphological differences between the control and FGR placenta are consistent with findings  
306 of others<sup>42</sup>, and indicate villous mal-development, with fewer mature intermediate and terminal  
307 villi and reduced villous surface area, as well as elevated fibrosis. The increased villous  
308 capillary density and reduced syncytial knots in the studied FGR placentas are novel findings  
309 and may reflect adaptive responses to hypoxic-reoxygenation events secondary to reduced  
310 utero-placental and/or feto-placental flows in FGR pregnancies<sup>43-45</sup>. Moreover, these beneficial  
311 changes in placental morphology may be the explanation for the FGR babies in our study  
312 reaching near full term. Hence, morphological findings provide a clue to underlying placental  
313 mechanisms that may be subject to change, with the resultant amelioration of disease and  
314 improvement to fetal outcome, if they can be enacted *in utero*. There is already significant  
315 interest in delivery of targeted agents to the uterine arteries to improve blood flow<sup>46</sup>. Delivery  
316 of agents to target specific areas of pathology and functional deficit within the placenta to  
317 improve the clinical condition may also be a potential therapeutic option.

318

319 Our approach to combine morphological assessments with gene expression aimed to identify  
320 some key aetiological pathways for the pathology seen. Expression of placental *IGF2*, *SLC2A3*  
321 and *SLC38A1* was lower across the FGR placenta, correlating with volumes and other specific  
322 placental features, suggesting a global role for these molecules in placental structure and  
323 development in the presence of FGR. Indeed, *IGF2* is known to be important for the formation  
324 of the placental exchange interface in humans, among other species<sup>38,39,47</sup>, and is expressed at  
325 lower levels in placentas showing FGR/small for gestational age in some<sup>48,49</sup>, but not all  
326 studies<sup>50</sup>. Prior work has shown that a genetic deficiency of *SLC2A3* in mice leads to FGR<sup>37</sup>  
327 which supports our findings, but is in contrast to other work reporting an upregulation of its  
328 encoded protein in the human placenta of late-onset FGR<sup>51</sup>. Of the system A amino acid  
329 transporters expressed by the human placenta, *SLC38A1* is key for system A activity at term<sup>52</sup>.  
330 Other work has also shown that placental system A activity is reduced in explants prepared  
331 from term FGR placentas<sup>53</sup>. *VEGFA* was significantly lower in the peripheral region of the



332 placenta in FGR and correlated to the following placental pathology (terminal villi, trophoblast  
333 and capillary volume) that might suggest a causal association. This is consistent with other  
334 work reporting lower placental *VEGFA* expression at term in late onset FGR<sup>54,55</sup>, and the  
335 involvement of angiogenic factors more generally in normal and pathological pregnancies<sup>56</sup>.  
336 Our findings also have relevance for emerging pre-clinical research in placenta-directed gene  
337 therapy for FGR, including the utility of insulin-like growth factors and angiogenic  
338 regulators<sup>57</sup>. *HNF1A* was more highly expressed by the peripheral region compared with  
339 central region in healthy, but not FGR placentas. Little is known about the function of *HNF1A*  
340 in the placenta, although the human tissue atlas<sup>58</sup> indicates it is abundantly expressed by the  
341 villous syncytiotrophoblast<sup>59</sup>. Recent work has highlighted that *HNF1A* may regulate a large  
342 number of genes in trophoblast cells<sup>60</sup> and mediate metabolic changes<sup>61</sup>, which could be  
343 important for the placental support of fetal growth, more broadly.

344

345 Using a modelling approach in our discovery cohort, we demonstrated the potential of  
346 predicting outcome (control or FGR) based on stereology and qPCR data. Stereology and qPCR  
347 measurements taken from the peripheral part of the placenta, and analysed together, have the  
348 highest predictive power. To avoid any possible overfitting of the models, we did not perform  
349 any feature selection in advance for tuning of the algorithm hyperparameters. Despite this, we  
350 were able to obtain predictions with very high accuracy, as, in fact, for the best model, only  
351 one sample out of 60 (4 samples from peripheral placenta part for each of 15 patients)  
352 considered was predicted incorrectly. Indeed, this subject was one that was most likely to be  
353 misclassified in all of the tested models. Nevertheless, we found that the morphological data  
354 clearly shows separation of features for control and FGR placentas and probably, this made it  
355 possible to obtain high quality constructed models. For the present study, we used a very strict  
356 LOOCV. Whilst modelling predictions were poor when qPCR data were used alone, adding  
357 these data to the analysis of stereology data improved prediction, hence, confirming importance  
358 of qPCR data and underlying link of these data with functional features. Whilst our modelling  
359 approach shows potential, future work would benefit from utilising a larger dataset, with  
360 extremes of pathology, to validate the model.

361

362 Overall, our data add to current understanding of placental function through comprehensive  
363 sampling of healthy placentas and those affected by disease (FGR) with careful deep  
364 histological analysis, integrated with expression of genes involved in key biological pathways  
365 regulating placental function. Whilst, our modelling approach requires validation, with further

366 pathology analysed, it offers the promise of better diagnostic yield and novel insight into  
367 biological pathways that affect FGR pregnancies.

368

## 369 **Material and methods:**

### 370 *Placental tissue collection and sampling*

371 Subjects were recruited from University College London Hospital NHS Foundation Trust,  
372 London, UK with ethics approval from the South-Central Oxford A research ethics committee  
373 (17/SC/0432). After written informed consent was obtained, term placental biopsies were  
374 collected from subjects diagnosed with late-onset FGR (n=7, FGR detected after 32 weeks'  
375 gestation and an estimated fetal weight and/or abdominal circumference below 3<sup>rd</sup> centile on  
376 population-based charts used clinically<sup>62</sup>), and from control subjects with appropriately grown  
377 fetuses (n=9 birthweight >10<sup>th</sup> centile and <90<sup>th</sup> centile). Data on maternal pre-existing  
378 conditions, previous obstetric history, ultrasound examination, and pregnancy complications  
379 were collected at the time of recruitment.

380

381 Placentas were weighed and sampled within 30 minutes of delivery. Sampling sites were  
382 chosen to be representative of four central and four peripheral regions always relative to cord  
383 insertion (Figure 4A). In marginal cord insertions, the placenta was orientated with the cord  
384 anterior. Sampling then took place relative to the cord insertion as in other cases. This meant  
385 there was one site that had less tissue to sample from initially, in non-central cord insertions,  
386 but that ultimately the same amount of tissue was sampled, and that tissue selection was directly  
387 related to the cord in the same way as all other samples. For each placenta, 8 tissue biopsies  
388 (with maternal tissue and fetal chorionic plate removed) were snap frozen using liquid nitrogen  
389 or dry ice and stored at -80°C. Neighboring sampling sites were then immersion-fixed in 4%  
390 paraformaldehyde.

391

392

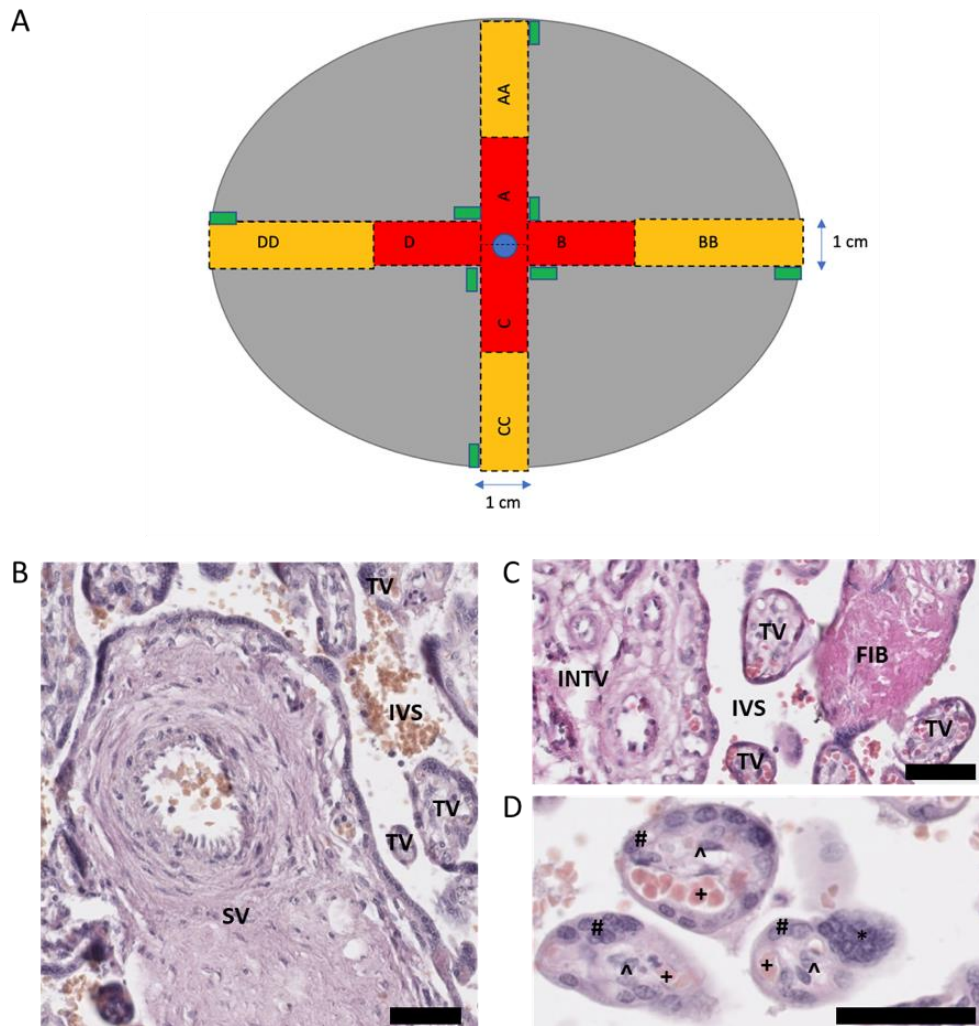

393

394

395 **Figure 4. Diagram showing sampling of placenta (A) and main parameters measured in**

396 **histological sections of placenta (B-D).** (A) Dotted lines indicate where the placenta should

397 be cut with a sterile histology knife. Red boxes with single letters indicate inner sections.

398 Yellow boxes with double letters indicate outer sections. Green rectangles represent samples

399 taken for RNA sampling. The central blue circle represents the umbilical cord (cut). (B-D)

400 Representative histological sections of term human placenta. Stereological analysis was

401 performed by identifying the intervillous space (IVS), stem villi (SV), intermediate villi

402 (INTV), terminal villi (TV), fibrosis (FIB), syncytial knots (\*); and under higher magnification

403 of terminal villi, the trophoblast cell layer (#), fetal capillaries (+) and stromal cells (^). The

404 scale bar denotes 50 μm.

405

406 ***RNA extraction, cDNA synthesis and qPCR***

407 Total RNA was extracted from n=9 control and n=6 FGR frozen placental tissues (n=1 FGR  
408 sample was not taken due to >30 minute delay in freezing this sample) using the RNeasy  
409 Fibrous Tissue Mini Kit (Qiagen, Hilden, Germany) following the manufacturer's protocol.  
410 Briefly, approximately 2mg of tissue was added to 300µl of lysis buffer and homogenized  
411 using a bead-based technique. Following treatment with proteinase K and addition of 100%  
412 ethanol, the homogenate was transferred to the spin columns, washed with supplied buffers  
413 and centrifuged to remove contaminants. Purified RNA was then eluted into RNase-free water.  
414 Quality and concentration of extracted RNA were determined by Nanodrop (Thermo Fisher  
415 Scientific, Waltham, CA, USA).

416  
417 Complementary DNA (cDNA) was synthesized using the Applied Biosystems High-Capacity  
418 cDNA Reverse Transcription Kit (Thermo Fisher Scientific) according to manufacturer's  
419 instructions on a thermal cycler. Real-time PCR was performed in duplicate using TaqMan™  
420 Universal Master Mix II, with UNG (Thermo Fisher Scientific) and inventoried TaqMan®  
421 gene expression assay probes with either VIC and FAM fluorophores for 5 housekeeping genes  
422 (*18SrRNA*, *B2M*, *GAPDH*, *GUSB* and *YWHAZ*) and 8 genes of interest (*HNF1A*, *IGF2*,  
423 *SLC2A1*, *SLC2A3*, *SLC38A1*, *SLC38A2*, *SLC38A4* and *VEGFA*) (Table 4). Only stable  
424 housekeeping genes (*18S rRNA*, *B2M*, *GADPH* and *YWHAZ*) that showed no statistically  
425 significant differences between cases and controls were included in the housekeeper geomean  
426 calculation for normalising gene expression across samples. The relative expression of genes  
427 of interest was then calculated using the  $2^{-\Delta\Delta C_t}$  method.

428

429 **Table 4 Probes used for real-time PCR**

| <b>Analysed genes</b> | <b>Gene symbol</b> | <b>Probe ID</b> | <b>Fluorophore</b> |
|-----------------------|--------------------|-----------------|--------------------|
| Housekeeping genes    | <i>18S rRNA</i>    | Hs99999901_s1   | VIC                |
|                       | <i>B2M</i>         | Hs00187842_m1   | VIC                |
|                       | <i>GAPDH</i>       | Hs02786624_g1   | VIC                |
|                       | <i>GUSB</i>        | Hs00939627_m1   | VIC                |
|                       | <i>YWHAZ</i>       | Hs01122445_g1   | VIC                |
| Genes of interest     | <i>HNF1A</i>       | Hs00167041_m1   | VIC                |
|                       | <i>IGF2</i>        | Hs04188276_m1   | FAM                |
|                       | <i>SLC2A1</i>      | Hs00892681_m1   | FAM                |

|  |                |               |     |
|--|----------------|---------------|-----|
|  | <i>SLC2A3</i>  | Hs00359840_m1 | FAM |
|  | <i>SLC38A1</i> | Hs01562175_m1 | FAM |
|  | <i>SLC38A2</i> | Hs01089954_m1 | VIC |
|  | <i>SLC38A4</i> | Hs00394339_m1 | FAM |
|  | <i>VEGFA</i>   | Hs00900055_m1 | FAM |

430

### 431 ***Histological preparation***

432 Following paraformaldehyde fixation, biopsies of 8 sites from each control (n=9) and FGR  
433 (n=7) placenta were embedded in paraffin using routine histological techniques and sectioned  
434 at 7 $\mu$ m thickness. Sections were rehydrated using xylene and ethanol gradients, stained with  
435 haematoxylin and eosin, dehydrated with ethanol gradients and xylene, then mounted with  
436 DPX. Slides were then scanned using a Nanozoomer digital slide scanner (Hamamatsu  
437 Photonics, Shizuoka Prefecture, Japan).

438

### 439 ***Placental stereology***

440 Placentas were analysed blinded to the diagnosis of FGR. To perform stereological analysis in  
441 a manner similar to that performed previously<sup>63</sup>; transparent lattices with test points, test lines  
442 or test arcs were superimposed onto scanned images viewed under different magnification on  
443 the NDP.view2 software (Hamamatsu Photonics). Volume densities of the intervillous space,  
444 stem villi, intermediate villi, terminal villi, syncytial knots, and fibrosis (Figure 4B-C) were  
445 estimated by point counting and a lattice of equally spaced test points arranged 4 by 4 under  
446 10X magnification in at least 13 fields of view for a minimum of 200 measurements per section.  
447 Volume densities of the trophoblast, stroma, and fetal capillaries (Figure 4D) within villi were  
448 estimated under a similar lattice under 40X magnification in 20 fields of view per sample.  
449 Absolute placental volumes were estimated by multiplying volume densities with placental  
450 weight (g). Arithmetic barrier thickness was assessed under 100X magnification in 20 fields of  
451 view per sample and a superimposed lattice with equally spaced straight test lines, which at  
452 times, intersected fetal capillary and villous trophoblast involved in exchange. The 'measure'  
453 tool within the software was then used to determine the shortest distance between a fetal  
454 capillary and the maternal blood space, where there was an intersection. Mean harmonic barrier  
455 thickness was calculated using the inverse of mean reciprocal of each raw arithmetic barrier  
456 thickness measurement. Thickness uniformity index, as a measure of the variability in  
457 thickness across the villous membrane, was obtained from the ratio of the mean arithmetic

458 barrier thickness to the mean harmonic barrier thickness. Surface densities were approximated  
459 by counting chance intersections of fetal capillaries and villous trophoblast involved in  
460 exchange with superimposed test arc lines under 40X magnification. To derive surface areas,  
461 surface densities were multiplied by placental villous volume. The theoretical diffusion  
462 capacity was calculated using the total surface area for exchange (averaged surface area of fetal  
463 capillaries and villi) divided by the mean harmonic barrier thickness and multiplied by Krogh's  
464 constant for oxygen diffusion. Specific diffusion capacity was then calculated by dividing the  
465 theoretical diffusion capacity by the infant birthweight.

466

### 467 ***Predictive modelling***

468 To evaluate the informativity of different placental sampling locations (only peripheral, only  
469 central or both regions together) and different data types (only stereological data, only PCR  
470 data or both types together), we studied all their possible combinations with analysis performed  
471 in R (version 4.0.2). To analyse several well-established multi-dimensional methods of data  
472 analysis, the machine learning models (*xgbTree*, *glmnet* and *nnet*) were implemented using  
473 *caret* package (version 6.0.90). All 27 models were trained with default set of hyperparameters,  
474 cross-validated on 5 folds (for a better selection of internal algorithm parameters), with seed  
475 parameter set to 123. The performance of models was assessed with receiver operating  
476 characteristic (ROC) curves using area under the curve (AUC) with 95% confidence intervals  
477 (*pROC* package, version 1.18.0). Results of AUCs were presented in two ways:

- 478 - *All sample's AUC* - Calculating AUC considering all samples as independent;
- 479 - *All patient's AUC* - Calculating AUC on patient's result's only (if all samples belonging  
480 to one patient were correctly predicted, then we assumed that a prediction for this  
481 patient was correct, if the prediction was wrong in at least one sample of the sample's  
482 patient, then it was set as wrong for this patient).

483 For illustration of interdependencies of features, which are presented in Supplementary Figure  
484 1, we selected the best pairs that showed significant differences between FGR and control  
485 groups using ANOVA test after applying FDR (false discovery rate) adjustment to test's p-  
486 values (*stats* package, Version 4.0.2).

487

### 488 ***Statistical analyses***

489 Normality of data was assessed by D'Agostino-Pearson normality test. ROUT testing for  
490 outliers was used to identify any outliers, which were then excluded from the analysis. For  
491 comparisons between 2 groups, Student's t tests and Mann-Whitney U tests were performed

492 for parametric and non-parametric continuous data, respectively. Categorical data between  
493 FGR and controls were analysed by a 2 X 2 contingency table with Fisher's Exact Test. Two-  
494 way ANOVAs followed by Sidak post hoc test for multiple comparisons were used to analyse  
495 mRNA expression data by pathology and sampling location. Graphpad Prism 6.01 (Graphpad  
496 Software Inc., La Jolla, CA, USA) was used for statistical analyses. A p-value of <0.05 was  
497 considered statistically significant for clinical characteristics and mRNA expression analysis.  
498 To account for multiple testing in histological analyses, a false discovery rate correction at 5%  
499 was applied to determine statistical significance.

500

### 501 **Acknowledgements**

502 ANSP received funding for this work via an Academy of Medical Sciences Springboard Grant,  
503 Dorothy Hodgkin Research Fellowship (DH130036/RG74249), MRC New Investigator Grant  
504 (MR/R022690/1/RG93186) and Lister Institute of Preventative Medicine Research Prize  
505 (RG93692). TN and AZ are supported by a Medical Research Council grant (MR/R02524X/1).  
506 HEJY was supported by an A\*STAR International Fellowship from the Agency for Science,  
507 Technology and Research. KM was supported by UCLH Charity and the Mitchell Charitable  
508 Trust. SLH received funding for this work via an Academy of Medical Sciences Clinical  
509 Lecturer Starter Grant and the UCLH EGA Obstetric Charity.

510

### 511 **Author contributions**

512 HEJY, KM, SLH and ANSP designed the study. HEJY, KM, MABY, ESP collected and/or  
513 performed experiments. HEJY, KM, ESP and TN analysed and graphed the data. TN and AZ  
514 provided predictive modelling analysis. HEJY, KM, TN, AZ, ALD, SLH and ANSP interpreted  
515 the data. HEJY, KM, SLH and ANSP wrote the paper. All authors performed final editing  
516 checks and approved the final manuscript.

517

518

## 519 **References**

520

- 521 1 Napso, T., Yong, H. E., Lopez-Tello, J. & Sferruzzi-Perri, A. N. The role of placental  
522 hormones in mediating maternal adaptations to support pregnancy and lactation.  
523 *Front Physiology* **9**:1091, doi:10.3389/fphys.2018.01091 (2018).
- 524 2 Burton, G. J., Fowden, A. L. & Thornburg, K. L. Placental Origins of Chronic Disease.  
525 *Physiological reviews* **96**, 1509-1565, doi:10.1152/physrev.00029.2015 (2016).
- 526 3 Byrne, M. *et al.* Structure-function relationships in the feto-placental circulation  
527 from in silico interpretation of micro-CT vascular structures. *J Theor Biol* **517**,  
528 110630, doi:10.1016/j.jtbi.2021.110630 (2021).
- 529 4 Aughwane, R. *et al.* Micro-CT and histological investigation of the spatial pattern of  
530 feto-placental vascular density. *Placenta* **88**, 36-43,  
531 doi:10.1016/j.placenta.2019.09.014 (2019).
- 532 5 World Health, O. *Every newborn: an action plan to end preventable deaths*. 55 p.  
533 (World Health Organization, 2014).
- 534 6 Lawn, J. E. *et al.* Every Newborn: progress, priorities, and potential beyond survival.  
535 *Lancet* **384**, 189-205, doi:10.1016/S0140-6736(14)60496-7 (2014).
- 536 7 Sharma, D., Shastri, S. & Sharma, P. Intrauterine Growth Restriction: Antenatal and  
537 Postnatal Aspects. *Clin Med Insights Pediatr* **10**, 67-83, doi:10.4137/CMPed.S40070  
538 (2016).
- 539 8 Gordijn, S. J. *et al.* Consensus definition of fetal growth restriction: a Delphi  
540 procedure. *Ultrasound Obstet Gynecol* **48**, 333-339, doi:10.1002/uog.15884 (2016).
- 541 9 Van den Berg, B. J. & Yerushalmy, J. The relationship of the rate of intrauterine  
542 growth of infants of low birth weight to mortality, morbidity, and congenital  
543 anomalies. *J Pediatr* **69**, 531-545, doi:10.1016/s0022-3476(66)80038-0 (1966).
- 544 10 Bianchi, M. E. & Restrepo, J. M. Low Birthweight as a Risk Factor for Non-  
545 communicable Diseases in Adults. *Front Med (Lausanne)* **8**, 793990,  
546 doi:10.3389/fmed.2021.793990 (2021).
- 547 11 Caradeux, J., Martinez-Portilla, R. J., Basuki, T. R., Kiserud, T. & Figueras, F. Risk of  
548 fetal death in growth-restricted fetuses with umbilical and/or ductus venosus absent  
549 or reversed end-diastolic velocities before 34 weeks of gestation: a systematic  
550 review and meta-analysis. *Am J Obstet Gynecol* **218**, S774-S782 e721,  
551 doi:10.1016/j.ajog.2017.11.566 (2018).
- 552 12 Ishihara, N. *et al.* Increased apoptosis in the syncytiotrophoblast in human term  
553 placentas complicated by either preeclampsia or intrauterine growth retardation.  
554 *Am J Obstet Gynecol* **186**, 158-166, doi:10.1067/mob.2002.119176 (2002).
- 555 13 Mayhew, T. M., Wijesekara, J., Baker, P. N. & Ong, S. S. Morphometric evidence that  
556 villous development and fetoplacental angiogenesis are compromised by  
557 intrauterine growth restriction but not by pre-eclampsia. *Placenta* **25**, 829-833,  
558 doi:10.1016/j.placenta.2004.04.011 (2004).
- 559 14 Macara, L. *et al.* Structural analysis of placental terminal villi from growth-restricted  
560 pregnancies with abnormal umbilical artery Doppler waveforms. *Placenta* **17**, 37-48,  
561 doi:10.1016/s0143-4004(05)80642-3 (1996).
- 562 15 Teasdale, F. & Jean-Jacques, G. Intrauterine growth retardation: morphometry of the  
563 microvillous membrane of the human placenta. *Placenta* **9**, 47-55 (1988).



- 564 16 Burton, G. J. & Fowden, A. L. The placenta: a multifaceted, transient organ. *Philos*  
565 *Trans R Soc Lond B Biol Sci* **370**, 20140066, doi:10.1098/rstb.2014.0066 (2015).
- 566 17 Chavatte-Palmer, P. & Tarrade, A. Placentation in different mammalian species. *Ann*  
567 *Endocrinol (Paris)* **77**, 67-74, doi:10.1016/j.ando.2016.04.006 (2016).
- 568 18 Pere, M. C. Materno-foetal exchanges and utilisation of nutrients by the foetus:  
569 comparison between species. *Reprod Nutr Dev* **43**, 1-15, doi:10.1051/rnd:2003002  
570 (2003).
- 571 19 Crawford, M. A., Hassam, A. G. & Williams, G. Essential fatty acids and fetal brain  
572 growth. *Lancet* **1**, 452-453, doi:10.1016/s0140-6736(76)91476-8 (1976).
- 573 20 Gresham, E. L., Simons, P. S. & Battaglia, F. C. Maternal-fetal urea concentration  
574 difference in man: metabolic significance. *J Pediatr* **79**, 809-811, doi:10.1016/s0022-  
575 3476(71)80396-7 (1971).
- 576 21 Sferruzzi-Perri, A. N. *et al.* Placental-specific Igf2 deficiency alters developmental  
577 adaptations to undernutrition in mice. *Endocrinology* **152**, 3202-3212,  
578 doi:10.1210/en.2011-0240 (2011).
- 579 22 Sferruzzi-Perri, A. N. *et al.* An obesogenic diet during mouse pregnancy modifies  
580 maternal nutrient partitioning and the fetal growth trajectory. *Faseb J* **27**, 3928-  
581 3937, doi:10.1096/fj.13-234823 (2013).
- 582 23 Vaughan, O. R., Sferruzzi-Perri, A. N. & Fowden, A. L. Maternal corticosterone  
583 regulates nutrient allocation to fetal growth in mice. *The Journal of physiology* **590**,  
584 5529-5540 (2012).
- 585 24 Higgins, J. S., Vaughan, O. R., de Liger, E. F., Fowden, A. L. & Sferruzzi-Perri, A. N.  
586 Placental phenotype and resource allocation to fetal growth are modified by the  
587 timing and degree of hypoxia during mouse pregnancy. *J Physiol* **594**, 1341-1356,  
588 doi:10.1113/JP271057 (2015).
- 589 25 Napso, T., Hung, Y. P., Davidge, S. T., Care, A. S. & Sferruzzi-Perri, A. N. Advanced  
590 maternal age compromises fetal growth and induces sex-specific changes in  
591 placental phenotype in rats. *Sci Rep* **9**, 16916, doi:10.1038/s41598-019-53199-x  
592 (2019).
- 593 26 Lewis, R. M. & Sferruzzi-Perri, A. N. in *Developmental Origins of Health and Disease*  
594 (eds L. Poston, K. M. Godfrey, M. A. Hanson, & P. Gluckman) (Cambridge University  
595 Press).
- 596 27 Audette, M. C., McLaughlin, K. & Kingdom, J. C. Second Trimester Placental Growth  
597 Factor Levels and Placental Histopathology in Low-Risk Nulliparous Pregnancies. *J*  
598 *Obstet Gynaecol Can* **43**, 1145-1152 e1141, doi:10.1016/j.jogc.2021.01.018 (2021).
- 599 28 Burton, G. J. *et al.* Optimising sample collection for placental research. *Placenta* **35**,  
600 9-22, doi:10.1016/j.placenta.2013.11.005 (2014).
- 601 29 Mayhew, T. M. Taking tissue samples from the placenta: an illustration of principles  
602 and strategies. *Placenta* **29**, 1-14, doi:10.1016/j.placenta.2007.05.010 (2008).
- 603 30 Mayhew, T. M. Morphomics: An integral part of systems biology of the human  
604 placenta. *Placenta* **36**, 329-340, doi:10.1016/j.placenta.2015.01.001 (2015).
- 605 31 Salafia, C. M. *et al.* Placental surface shape, function, and effects of maternal and  
606 fetal vascular pathology. *Placenta* **31**, 958-962, doi:10.1016/j.placenta.2010.09.005  
607 (2010).
- 608 32 Gordon, Z. *et al.* Anthropometry of fetal vasculature in the chorionic plate. *J Anat*  
609 **211**, 698-706, doi:10.1111/j.1469-7580.2007.00819.x (2007).

- 610 33 Heifetz, S. A. The umbilical cord: obstetrically important lesions. *Clin Obstet Gynecol*  
611 **39**, 571-587, doi:10.1097/00003081-199609000-00007 (1996).
- 612 34 Sferruzzi-Perri, A. N. & Camm, E. J. The programming power of the placenta.  
613 *Frontiers in Physiology* **7:33**, doi:10.3389/fphys.2016.00033 (2016).
- 614 35 Vaughan, O. R. *et al.* Placenta-specific Slc38a2/SNAT2 knockdown causes fetal  
615 growth restriction in mice. *Clin Sci (Lond)* **135**, 2049-2066, doi:10.1042/CS20210575  
616 (2021).
- 617 36 Luscher, B. P. *et al.* Placental glucose transporter (GLUT)-1 is down-regulated in  
618 preeclampsia. *Placenta* **55**, 94-99, doi:10.1016/j.placenta.2017.04.023 (2017).
- 619 37 Ganguly, A. *et al.* Glucose transporter isoform-3 mutations cause early pregnancy  
620 loss and fetal growth restriction. *American journal of physiology* **292**, E1241-1255  
621 (2007).
- 622 38 Sferruzzi-Perri, A. N., Owens, J. A., Pringle, K. G. & Roberts, C. T. The neglected role  
623 of insulin-like growth factors in the maternal circulation regulating fetal growth. *The*  
624 *Journal of physiology* **589**, 7-20 (2010).
- 625 39 Sferruzzi-Perri, A. N., Sandovici, I., Constanica, M. & Fowden, A. L. Placental  
626 phenotype and the insulin-like growth factors: resource allocation to fetal growth.  
627 *The Journal of physiology* **595**, 5057-5093 (2017).
- 628 40 Mifsud, W. & Sebire, N. J. Placental pathology in early-onset and late-onset fetal  
629 growth restriction. *Fetal Diagn Ther* **36**, 117-128, doi:10.1159/000359969 (2014).
- 630 41 Brosens, I., Pijnenborg, R., Vercruyssen, L. & Romero, R. The "Great Obstetrical  
631 Syndromes" are associated with disorders of deep placentation. *Am J Obstet Gynecol*  
632 **204**, 193-201, doi:10.1016/j.ajog.2010.08.009 (2011).
- 633 42 Burton, G. J. & Jauniaux, E. Pathophysiology of placental-derived fetal growth  
634 restriction. *Am J Obstet Gynecol* **218**, S745-S761, doi:10.1016/j.ajog.2017.11.577  
635 (2018).
- 636 43 Kovo, M. *et al.* Placental vascular lesion differences in pregnancy-induced  
637 hypertension and normotensive fetal growth restriction. *Am J Obstet Gynecol* **202**,  
638 561 e561-565, doi:10.1016/j.ajog.2010.01.012 (2010).
- 639 44 Colson, A., Sonveaux, P., Debieve, F. & Sferruzzi-Perri, A. N. Adaptations of the  
640 human placenta to hypoxia: opportunities for interventions in fetal growth  
641 restriction. *Hum Reprod Update*, doi:10.1093/humupd/dmaa053 (2020).
- 642 45 Cindrova-Davies, T. & Sferruzzi-Perri, A. N. Human placental development and  
643 function. *Seminars in Cell and Developmental Biology* **In press** (2022).
- 644 46 David, A. L. *et al.* Local delivery of VEGF adenovirus to the uterine artery increases  
645 vasorelaxation and uterine blood flow in the pregnant sheep. *Gene Ther* **15**, 1344-  
646 1350, doi:10.1038/gt.2008.102 (2008).
- 647 47 Sferruzzi-Perri, A. N. Regulating needs: Exploring the role of insulin-like growth  
648 factor-2 signalling in materno-fetal resource allocation. *Placenta Suppl* **1**, S16-S22,  
649 doi:10.1016/j.placenta.2018.01.005 (2018).
- 650 48 Guo, L. *et al.* Altered gene expression and methylation of the human chromosome  
651 11 imprinted region in small for gestational age (SGA) placentae. *Dev Biol* **320**, 79-91,  
652 doi:10.1016/j.ydbio.2008.04.025 (2008).
- 653 49 Yamaguchi, Y. *et al.* Placenta-specific epimutation at H19-DMR among common  
654 pregnancy complications: its frequency and effect on the expression patterns of H19  
655 and IGF2. *Clin Epigenetics* **11**, 113, doi:10.1186/s13148-019-0712-3 (2019).

- 656 50 Antonazzo, P. *et al.* Placental IGF2 Expression in Normal and Intrauterine Growth  
657 Restricted (IUGR) Pregnancies. *Placenta* **29**, 99-101 (2008).
- 658 51 Janzen, C. *et al.* Placental glucose transporter 3 (GLUT3) is up-regulated in human  
659 pregnancies complicated by late-onset intrauterine growth restriction. *Placenta* **34**,  
660 1072-1078, doi:10.1016/j.placenta.2013.08.010 (2013).
- 661 52 Desforges, M., Greenwood, S. L., Glazier, J. D., Westwood, M. & Sibley, C. P. The  
662 contribution of SNAT1 to system A amino acid transporter activity in human  
663 placental trophoblast. *Biochem Biophys Res Commun* **398**, 130-134,  
664 doi:10.1016/j.bbrc.2010.06.051 (2010).
- 665 53 Shibata, E. *et al.* Placental System A Amino Acid Transport is Reduced in Pregnancies  
666 With Small For Gestational Age (SGA) Infants but Not in Preeclampsia with SGA  
667 Infants. *Placenta* **29**, 879-882 (2008).
- 668 54 Lash, G. *et al.* Abnormal fetal growth is not associated with altered chorionic villous  
669 expression of vascular endothelial growth factor mRNA. *Mol Hum Reprod* **7**, 1093-  
670 1098, doi:10.1093/molehr/7.11.1093 (2001).
- 671 55 Lyall, F., Young, A., Boswell, F., Kingdom, J. C. & Greer, I. A. Placental expression of  
672 vascular endothelial growth factor in placentae from pregnancies complicated by  
673 pre-eclampsia and intrauterine growth restriction does not support placental  
674 hypoxia at delivery. *Placenta* **18**, 269-276, doi:10.1016/s0143-4004(97)80061-6  
675 (1997).
- 676 56 Andraweera, P. H., Dekker, G. A. & Roberts, C. T. The vascular endothelial growth  
677 factor family in adverse pregnancy outcomes. *Hum Reprod Update* **18**, 436-457,  
678 doi:10.1093/humupd/dms011 (2012).
- 679 57 Krishnan, T. & David, A. L. Placenta-directed gene therapy for fetal growth  
680 restriction. *Semin Fetal Neonatal Med* **22**, 415-422, doi:10.1016/j.siny.2017.04.005  
681 (2017).
- 682 58 Uhlen, M. *et al.* Proteomics. Tissue-based map of the human proteome. *Science* **347**,  
683 1260419, doi:10.1126/science.1260419 (2015).
- 684 59 Human Protein Atlas Team. *Human Protein Atlas - HNF1A in the placenta*,  
685 <<https://www.proteinatlas.org/ENSG00000135100-HNF1A/tissue/placenta>> (  
686 60 Ducat, A. *et al.* Low-dose aspirin protective effects are correlated with deregulation  
687 of HNF factor expression in the preeclamptic placentas from mice and humans. *Cell*  
688 *Death Discov* **5**, 94, doi:10.1038/s41420-019-0170-x (2019).
- 689 61 Rout, M. & Lulu, S. S. Molecular and disease association of gestational diabetes  
690 mellitus affected mother and placental datasets reveal a strong link between insulin  
691 growth factor (IGF) genes in amino acid transport pathway: A network biology  
692 approach. *J Cell Biochem*, doi:10.1002/jcb.27418 (2018).
- 693 62 Brenner, W. E., Edelman, D. A. & Hendricks, C. H. A standard of fetal growth for the  
694 United States of America. *Am J Obstet Gynecol* **126**, 555-564, doi:10.1016/0002-  
695 9378(76)90748-1 (1976).
- 696 63 Mayhew, T. M. Stereology and the placenta: where's the point? -- a review. *Placenta*  
697 **27 Suppl A**, S17-25, doi:10.1016/j.placenta.2005.11.006 (2006).

698

699

700

## 701 SUPPLEMENTARY INFORMATION

## 702 Supplementary Table 1: Full phenotype clinical data.

| ID        | Status   | Medical history | Pregnancy complications | Maternal age quartile (years) | Ethnicity | Maternal booking BMI | Delivery mode    | Gestation | Birthweight (g) | Infant sex | Placenta weight (g) | Placenta/BW ratio (%) | Analysis comments |
|-----------|----------|-----------------|-------------------------|-------------------------------|-----------|----------------------|------------------|-----------|-----------------|------------|---------------------|-----------------------|-------------------|
| Control 1 | Control  |                 |                         | 31-35                         | Asian     | 34                   | Vaginal delivery | 39+6      | 3200            | Male       | 442                 | 13.8                  |                   |
| Control 2 | Control  |                 |                         | 36-40                         | White     | 21                   | cat4 CS          | 39+1      | 3690            | Female     | 516                 | 14.0                  |                   |
| Control 3 | Control  |                 |                         | 21-25                         | White     | 20                   | Vaginal delivery | 39+0      | 3800            | Female     | 534                 | 14.1                  |                   |
| Control 4 | Control  |                 |                         | 31-35                         | White     | 23                   | cat3 CS          | 41+1      | 3970            | Male       | 509                 | 12.8                  |                   |
| Control 5 | Control  |                 |                         | 41-45                         | White     | 27                   | cat4 CS          | 39+1      | 3960            | Female     | 481                 | 12.1                  |                   |
| Control 6 | Control  |                 |                         | 36-40                         | White     | 24                   | cat4 CS          | 39+1      | 2893            | Female     | 413                 | 14.3                  |                   |
| Control 7 | Control  |                 |                         | 36-40                         | White     | 23                   | Vaginal delivery | 39+0      | 3618            | Male       | 491                 | 13.6                  |                   |
| Control 8 | Control  |                 |                         | 36-40                         | White     | 23                   | cat4 CS          | 39+1      | 3140            | Male       | 398                 | 12.7                  |                   |
| Control 9 | Control  |                 |                         | 31-35                         | White     | 28                   | Vaginal delivery | 39+5      | 3510            | Male       | 526                 | 15.0                  |                   |
| FGR 1     | Late FGR |                 |                         | 31-35                         | White     | 23                   | cat3 CS          | 37+0      | 1410            | Male       | 160                 | 11.3                  |                   |

|       |          |             |                      |       |                |    |                  |      |      |        |     |      |                  |
|-------|----------|-------------|----------------------|-------|----------------|----|------------------|------|------|--------|-----|------|------------------|
| FGR 2 | Late FGR | Hypothyroid |                      | 31-35 | White          | 22 | Vaginal delivery | 37+5 | 2510 | Female | 346 | 13.8 |                  |
| FGR 3 | Late FGR | Migraines   |                      | 31-35 | Chinese        | 22 | cat2 CS          | 37+2 | 2560 | Male   | 380 | 14.8 |                  |
| FGR 4 | Late FGR |             | Low platelets        | 26-30 | Afro Caribbean | 22 | cat2 CS          | 38+2 | 1985 | Male   | 380 | 19.1 |                  |
| FGR 5 | Late FGR |             |                      | 31-35 | Chinese        | 20 | Vaginal delivery | 39+4 | 2720 | Female | 360 | 13.2 |                  |
| FGR 6 | Late FGR |             | Gestational diabetes | 31-35 | Asian          | 38 | cat1 CS          | 38+4 | 2396 | Male   | 355 | 14.8 |                  |
| FGR 7 | Late FGR |             |                      | 36-40 | Afro Caribbean | 28 | cat3 CS          | 39+0 | 2750 | Male   | 404 | 14.7 | Not run for qPCR |

703

704 CS = caesarean section. Cat1 = Immediate threat to the life of the woman or fetus, Cat2 = Maternal or fetal compromise which is not immediately  
705 life-threatening, Cat3 = No maternal or fetal compromise but needs early birth, Cat4 = Birth timed to suit woman or healthcare provider. (NICE  
706 guideline 192: Caesarean birth, published 31 March 2021).

707

**Supplementary Table 2: Morphological differences in the placenta by sampling location.**

|                                          | Control (N=9) |             |         | FGR (N=7)    |              |         |
|------------------------------------------|---------------|-------------|---------|--------------|--------------|---------|
|                                          | Central       | Peripheral  | P-value | Central      | Peripheral   | P-value |
| <b>Volume density (cm<sup>3</sup>/g)</b> |               |             |         |              |              |         |
| Intervillous space                       | 0.39±0.02     | 0.36±0.01   | 0.130   | 0.36±0.02    | 0.35±0.02    | 0.577   |
| Stem villi                               | 0.06±0.01     | 0.06±0.01   | 0.902   | 0.06±0.02    | 0.05±0.01    | 0.364   |
| Intermediate villi                       | 0.1±0.01      | 0.13±0.01   | 0.105   | 0.08±0.01    | 0.08±0.01    | 0.720   |
| Terminal villi                           | 0.42±0.02     | 0.42±0.02   | 0.941   | 0.41±0.03    | 0.38±0.03    | 0.526   |
| Syncytial knots                          | 0.02±0.00     | 0.02±0.00   | 0.633   | 0.01±0.00    | 0.01±0.00    | 0.591   |
| Fibrosis                                 | 0.01±0.00     | 0.02±0.01   | 0.443   | 0.07±0.02    | 0.13±0.03    | 0.091   |
| Trophoblast                              | 0.33±0.02     | 0.31±0.01   | 0.492   | 0.34±0.02    | 0.33±0.04    | 0.818   |
| Stromal                                  | 0.53±0.03     | 0.57±0.02   | 0.239   | 0.45±0.04    | 0.46±0.06    | 0.865   |
| Capillary                                | 0.14±0.01     | 0.12±0.01   | 0.139   | 0.21±0.03    | 0.21±0.03    | 0.963   |
| <b>Volume (cm<sup>3</sup>)</b>           |               |             |         |              |              |         |
| Intervillous space                       | 187.75±10.19  | 171.7±9.96  | 0.277   | 121.96±11.52 | 116.92±10.14 | 0.748   |
| Stem villi                               | 27.82±5.18    | 27.85±2.89  | 0.100   | 23.24±6.3    | 17.1±2.58    | 0.385   |
| Intermediate villi                       | 49.91±4.81    | 60.89±5.94  | 0.170   | 24.77±2.83   | 26.19±2.23   | 0.700   |
| Terminal villi                           | 199.23±8.7    | 202.24±13.7 | 0.855   | 141.08±17.48 | 129.51±15.51 | 0.630   |
| Syncytial knots                          | 8.89±0.9      | 7.89±1.12   | 0.495   | 2.24±0.66    | 2.63±0.82    | 0.720   |
| Fibrosis                                 | 3.9±1.93      | 7.87±4.69   | 0.446   | 26.28±6.89   | 47.77±9.57   | 0.094   |
| Trophoblast                              | 156.49±6.76   | 150.51±8.25 | 0.583   | 117.28±13.22 | 112.13±15.07 | 0.802   |

|                                                                |              |              |       |              |              |       |
|----------------------------------------------------------------|--------------|--------------|-------|--------------|--------------|-------|
| Stromal                                                        | 254.68±18.75 | 271.49±12.97 | 0.472 | 150.39±19.02 | 156.07±25.00 | 0.860 |
| Capillary                                                      | 67.72±5.88   | 56.89±5.04   | 0.181 | 73.05±14.18  | 72.51±13.58  | 0.979 |
| <b>Barrier thickness (µm)</b>                                  |              |              |       |              |              |       |
| Arithmetic mean                                                | 2.84±0.08    | 2.82±0.10    | 0.885 | 2.84±0.19    | 2.86±0.18    | 0.940 |
| Harmonic mean                                                  | 2.14±0.07    | 2.15±0.07    | 0.918 | 2.24±0.15    | 2.24±0.14    | 0.987 |
| Thickness uniformity index                                     | 1.33±0.02    | 1.31±0.02    | 0.508 | 1.47±0.08    | 1.48±0.08    | 0.936 |
| <b>Surface density (cm<sup>2</sup>/cm<sup>3</sup>)</b>         |              |              |       |              |              |       |
| Villi                                                          | 613.67±27.94 | 607.22±24.07 | 0.863 | 634.49±43.19 | 626.07±47.42 | 0.898 |
| Fetal capillary                                                | 318.63±27.71 | 277.88±13.62 | 0.206 | 406.06±47.11 | 397.78±51.52 | 0.906 |
| <b>Surface area (m<sup>2</sup>)</b>                            |              |              |       |              |              |       |
| Villi                                                          | 15.32±0.97   | 15.99±0.92   | 0.622 | 10.87±1.63   | 10.3±1.51    | 0.801 |
| Fetal capillary                                                | 7.89±0.75    | 7.32±0.44    | 0.519 | 7.11±1.31    | 6.67±1.2     | 0.807 |
| <b>Theoretical diffusion capacity (cm<sup>2</sup>/min/kPa)</b> | 94.95±5.96   | 95.64±4.31   | 0.926 | 71.63±11.95  | 68.89±11.61  | 0.872 |
| <b>Specific diffusion capacity (cm<sup>2</sup>/min/kPa/g)</b>  | 27.15±1.86   | 27.24±1.23   | 0.968 | 30.24±4.58   | 28.7±3.71    | 0.798 |

**Supplementary Table 3: Summary tables of errors in all 27 models for each patient.**

| ONLY PERIPHERAL |       |                  |        |      |         |        |      |            |        |      |
|-----------------|-------|------------------|--------|------|---------|--------|------|------------|--------|------|
| id              | score | STEREOLOGY & PCR |        |      | PCR     |        |      | STEREOLOGY |        |      |
|                 |       | xgbTree          | glmnet | nnet | xgbTree | glmnet | nnet | xgbTree    | glmnet | nnet |
| Control 1       | 0     | 0of4             | 0of4   | 0of4 | 1of4    | 1of4   | 1of4 | 0of4       | 0of4   | 0of4 |
| Control 2       | 0     | 1of4             | 0of4   | 0of4 | 0of4    | 0of4   | 0of4 | 1of4       | 0of4   | 0of4 |
| Control 3       | 0     | 0of4             | 0of4   | 0of4 | 0of4    | 1of4   | 1of4 | 0of4       | 0of4   | 0of4 |
| Control 4       | 0     | 0of4             | 0of4   | 0of4 | 4of4    | 3of4   | 3of4 | 0of4       | 0of4   | 0of4 |
| Control 5       | 0     | 0of4             | 0of4   | 0of4 | 2of4    | 0of4   | 0of4 | 0of4       | 0of4   | 0of4 |
| Control 6       | 0     | 0of4             | 0of4   | 0of4 | 3of4    | 3of4   | 4of4 | 0of4       | 0of4   | 0of4 |
| Control 7       | 0     | 0of4             | 0of4   | 0of4 | 0of4    | 0of4   | 0of4 | 0of4       | 0of4   | 0of4 |
| Control 8       | 0     | 0of4             | 0of4   | 0of4 | 1of4    | 2of4   | 2of4 | 0of4       | 0of4   | 1of4 |
| Control 9       | 0     | 0of4             | 0of4   | 0of4 | 0of4    | 0of4   | 0of4 | 0of4       | 0of4   | 0of4 |
| FGR 1           | 1     | 4of4             | 0of4   | 0of4 | 4of4    | 4of4   | 4of4 | 0of4       | 0of4   | 0of4 |
| FGR 2           | 1     | 0of4             | 0of4   | 0of4 | 0of4    | 0of4   | 0of4 | 0of4       | 0of4   | 0of4 |
| FGR 3           | 1     | 0of4             | 0of4   | 0of4 | 0of4    | 0of4   | 0of4 | 0of4       | 0of4   | 0of4 |
| FGR 4           | 1     | 0of4             | 0of4   | 0of4 | 0of4    | 0of4   | 0of4 | 0of4       | 0of4   | 0of4 |
| FGR 5           | 1     | 0of4             | 0of4   | 0of4 | 0of4    | 0of4   | 0of4 | 0of4       | 0of4   | 0of4 |
| FGR 6           | 1     | 4of4             | 3of4   | 1of4 | 4of4    | 4of4   | 4of4 | 4of4       | 3of4   | 3of4 |

| ONLY CENTRAL |       |                  |        |      |         |        |      |            |        |      |
|--------------|-------|------------------|--------|------|---------|--------|------|------------|--------|------|
| id           | score | STEREOLOGY & PCR |        |      | PCR     |        |      | STEREOLOGY |        |      |
|              |       | xgbTree          | glmnet | nnet | xgbTree | glmnet | nnet | xgbTree    | glmnet | nnet |
| Control 1    | 0     | 0of4             | 0of4   | 0of4 | 0of4    | 0of4   | 0of4 | 0of4       | 0of4   | 0of4 |
| Control 2    | 0     | 0of4             | 0of4   | 0of4 | 0of4    | 0of4   | 0of4 | 0of4       | 0of4   | 0of4 |
| Control 3    | 0     | 0of4             | 0of4   | 0of4 | 2of4    | 2of4   | 0of4 | 0of4       | 0of4   | 0of4 |
| Control 4    | 0     | 0of4             | 0of4   | 0of4 | 2of4    | 3of4   | 3of4 | 0of4       | 0of4   | 0of4 |
| Control 5    | 0     | 0of4             | 0of4   | 0of4 | 0of4    | 0of4   | 0of4 | 0of4       | 0of4   | 0of4 |
| Control 6    | 0     | 3of4             | 2of4   | 1of4 | 3of4    | 3of4   | 3of4 | 0of4       | 0of4   | 0of4 |
| Control 7    | 0     | 0of4             | 0of4   | 0of4 | 0of4    | 0of4   | 0of4 | 0of4       | 0of4   | 0of4 |
| Control 8    | 0     | 2of4             | 0of4   | 1of4 | 0of4    | 0of4   | 1of4 | 2of4       | 1of4   | 1of4 |
| Control 9    | 0     | 0of4             | 0of4   | 0of4 | 1of4    | 2of4   | 1of4 | 0of4       | 0of4   | 0of4 |
| FGR 1        | 1     | 1of4             | 0of4   | 0of4 | 4of4    | 4of4   | 4of4 | 0of4       | 0of4   | 0of4 |
| FGR 2        | 1     | 0of4             | 0of4   | 0of4 | 0of4    | 0of4   | 0of4 | 0of4       | 0of4   | 0of4 |
| FGR 3        | 1     | 0of4             | 0of4   | 0of4 | 0of4    | 0of4   | 0of4 | 0of4       | 0of4   | 0of4 |
| FGR 4        | 1     | 0of4             | 0of4   | 0of4 | 0of4    | 0of4   | 0of4 | 1of4       | 0of4   | 0of4 |
| FGR 5        | 1     | 0of4             | 0of4   | 0of4 | 0of4    | 0of4   | 0of4 | 0of4       | 0of4   | 0of4 |
| FGR 6        | 1     | 4of4             | 4of4   | 4of4 | 4of4    | 4of4   | 4of4 | 3of4       | 4of4   | 4of4 |

| CENTRAL & PERIPHERAL |       |                  |        |      |         |        |      |            |        |      |
|----------------------|-------|------------------|--------|------|---------|--------|------|------------|--------|------|
| id                   | score | STEREOLOGY & PCR |        |      | PCR     |        |      | STEREOLOGY |        |      |
|                      |       | xgbTree          | glmnet | nnet | xgbTree | glmnet | nnet | xgbTree    | glmnet | nnet |
| Control 1            | 0     | 1of8             | 0of8   | 0of8 | 1of8    | 1of8   | 1of8 | 1of8       | 0of8   | 0of8 |
| Control 2            | 0     | 0of8             | 0of8   | 0of8 | 0of8    | 0of8   | 0of8 | 0of8       | 0of8   | 0of8 |
| Control 3            | 0     | 0of8             | 0of8   | 0of8 | 1of8    | 2of8   | 2of8 | 0of8       | 0of8   | 0of8 |
| Control 4            | 0     | 0of8             | 0of8   | 0of8 | 5of8    | 2of8   | 5of8 | 0of8       | 0of8   | 0of8 |
| Control 5            | 0     | 0of8             | 0of8   | 0of8 | 2of8    | 0of8   | 0of8 | 0of8       | 0of8   | 0of8 |
| Control 6            | 0     | 3of8             | 1of8   | 0of8 | 6of8    | 7of8   | 6of8 | 0of8       | 0of8   | 0of8 |
| Control 7            | 0     | 0of8             | 0of8   | 0of8 | 0of8    | 0of8   | 0of8 | 1of8       | 0of8   | 0of8 |
| Control 8            | 0     | 1of8             | 0of8   | 0of8 | 1of8    | 1of8   | 1of8 | 1of8       | 2of8   | 0of8 |
| Control 9            | 0     | 1of8             | 0of8   | 0of8 | 1of8    | 0of8   | 0of8 | 1of8       | 0of8   | 0of8 |
| FGR 1                | 1     | 0of8             | 0of8   | 0of8 | 8of8    | 8of8   | 8of8 | 0of8       | 0of8   | 0of8 |
| FGR 2                | 1     | 0of8             | 0of8   | 0of8 | 0of8    | 0of8   | 0of8 | 0of8       | 0of8   | 0of8 |
| FGR 3                | 1     | 0of8             | 0of8   | 0of8 | 1of8    | 0of8   | 0of8 | 1of8       | 0of8   | 0of8 |
| FGR 4                | 1     | 0of8             | 0of8   | 0of8 | 0of8    | 0of8   | 0of8 | 0of8       | 0of8   | 0of8 |
| FGR 5                | 1     | 0of8             | 0of8   | 0of8 | 0of8    | 1of8   | 1of8 | 0of8       | 0of8   | 0of8 |
| FGR 6                | 1     | 8of8             | 7of8   | 5of8 | 8of8    | 8of8   | 8of8 | 6of8       | 7of8   | 7of8 |

Each cell for each patient and 27 models considered (different columns) indicates how many wrong predictions were made for this patient among all 4 or 8 available samples (for example, the entry 0of4 means that 0 errors were made among 4 predictions). The cell is highlighted in



red if at least one mistake was made for the patient. Third column in the first panel corresponds to the best model, using *nnet* ML algorithm, and both stereology and PCR data for peripheral samples. This model returns only one wrong prediction out of 60 samples considered.

## Supplementary Figure 1: Different interdependencies of features for stereological data.

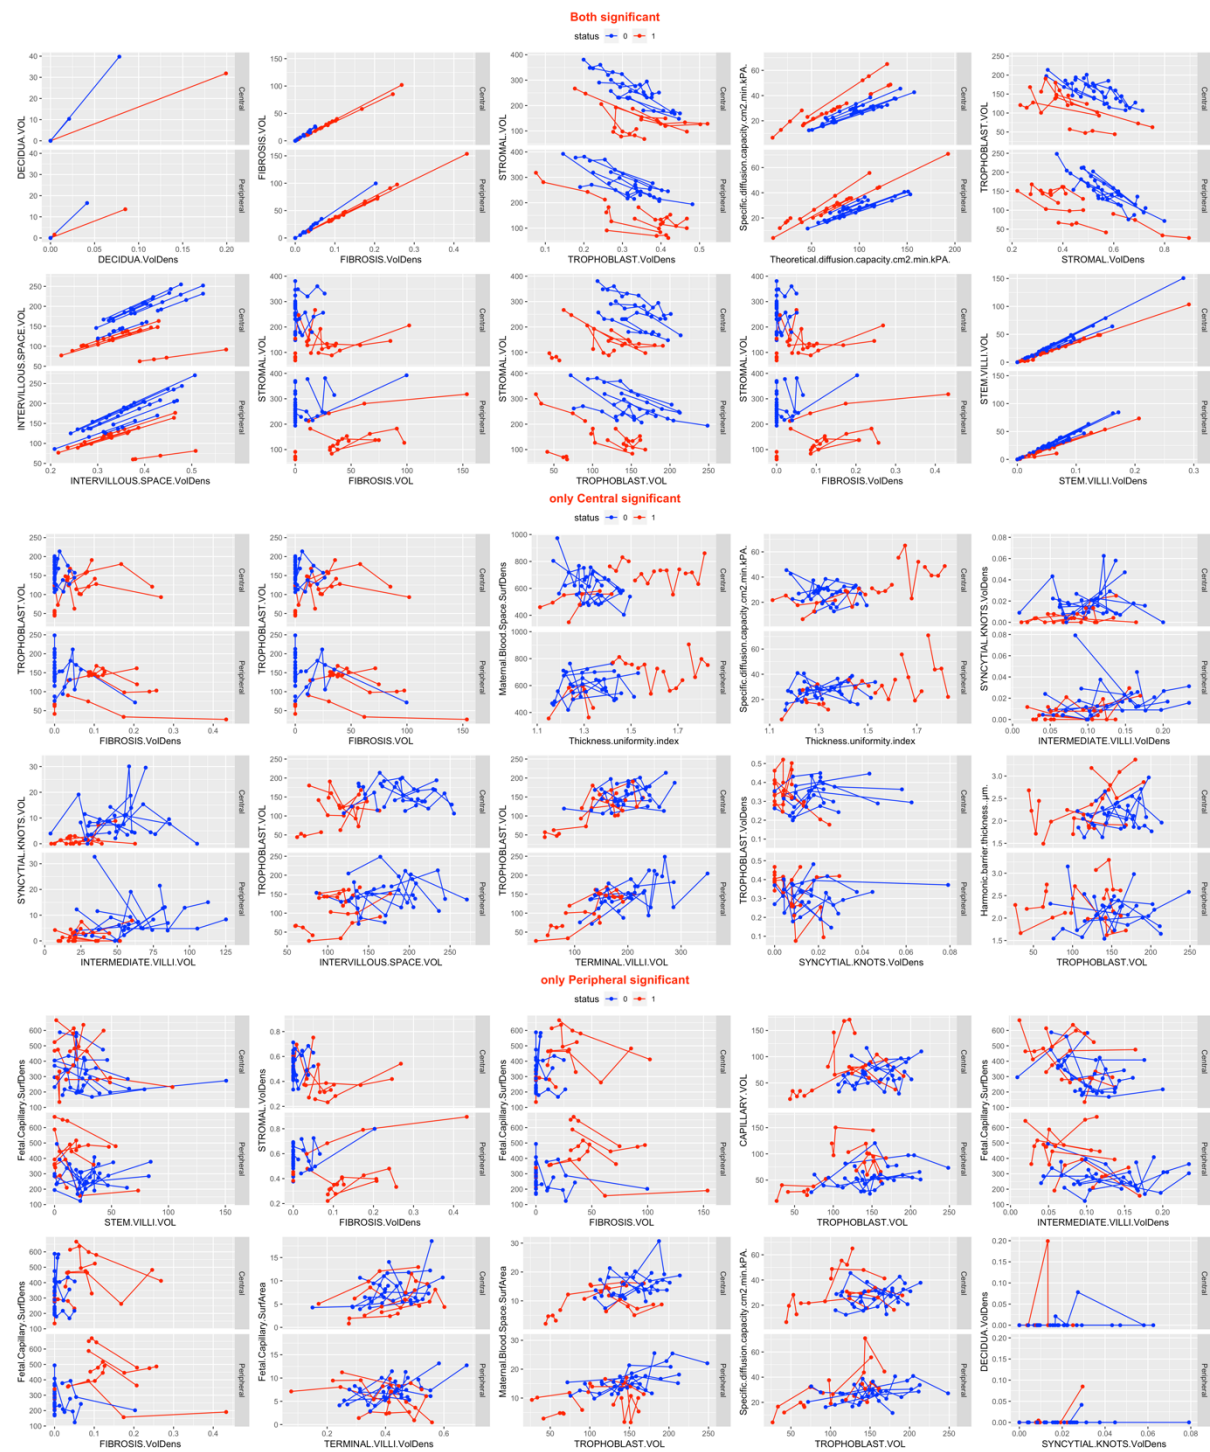

Different interdependencies of features for Control (blue colour) and FGR (red colour) on stereological data. Each point is a separate patient measurement, each line connects all measurements for each patient. For many pairs of features, a separation between FGR cases and controls was easily seen, hence, enabling a construction of a successful predictive model.
